# Supplementary material
Source: publisher figshare collection journal article supplement (https://sage.figshare.com/ndownloader/files/19803644)
Supplement: Supplementary file 1 [file 19803644]

Table S1

Meta-Analytic Estimates of Correlations among Study Variables, Supplementary Study

| Variables                |           | 1     | 2     | 3     | 4     | 5     | 6    | 7    | 8    | 9    |
|--------------------------|-----------|-------|-------|-------|-------|-------|------|------|------|------|
| 1. Abusive supervision   | k         |       | 10    | 11    | 14    | 5     | 7    | 8    | 28   | 14   |
|                          | N         |       | 3212  | 3034  | 3916  | 1238  | 2007 | 1848 | 9917 | 4470 |
|                          | $\bar{r}$ | (.89) | -.31  | -.34  | -.51  | .37   | -.21 | -.17 | .38  | .37  |
|                          | LL        |       | -.40  | -.44  | -.60  | .19   | -.28 | -.24 | .31  | .30  |
|                          | UL        |       | -.22  | -.23  | -.42  | .53   | -.14 | -.09 | .44  | .42  |
| 2. Distributive justice  | k         |       |       | 62    | 14    | 3     | 6    | 6    | 10   | 11   |
|                          | N         |       |       | 38337 | 3018  | 679   | 1838 | 1838 | 2827 | 2963 |
|                          | $\bar{r}$ |       | (.88) | .55   | .46   | -.20  | .19  | .12  | -.09 | -.07 |
|                          | LL        |       |       | -.27  | .32   | -.50  | .19  | .04  | -.25 | -.17 |
|                          | UL        |       |       | .89   | .77   | .13   | .19  | .20  | .07  | .04  |
| 3. Procedural justice    | k         |       |       |       | 20    | 4     | 13   | 13   | 11   | 11   |
|                          | N         |       |       |       | 4703  | 747   | 3653 | 3653 | 3486 | 3486 |
|                          | $\bar{r}$ |       |       | (.89) | .54   | -.29  | .22  | .10  | -.19 | -.19 |
|                          | LL        |       |       |       | .20   | -.42  | .22  | .01  | -.22 | -.19 |
|                          | UL        |       |       |       | .93   | -.13  | .22  | .19  | -.15 | -.19 |
| 4. Interactional justice | k         |       |       |       |       | 3     | 6    | 6    | 4    | 4    |
|                          | N         |       |       |       |       | 455   | 1964 | 1964 | 1092 | 1092 |
|                          | $\bar{r}$ |       |       |       | (.91) | -.18  | .20  | .19  | -.18 | -.28 |
|                          | LL        |       |       |       |       | -.27  | .05  | .03  | -.18 | -.28 |
|                          | UL        |       |       |       |       | -.09  | .34  | .36  | -.18 | -.28 |
| 5. Work stress           | k         |       |       |       |       |       | 22   | 24   | 3    | 10   |
|                          | N         |       |       |       |       |       | 5930 | 7840 | 1785 | 2734 |
|                          | $\bar{r}$ |       |       |       |       | (.93) | -.21 | -.16 | .34  | .30  |
|                          | LL        |       |       |       |       |       | -.82 | -.46 | .25  | .19  |

| Variables |           | 1 | 2 | 3 | 4 | 5 | 6     | 7     | 8     | 9     |
|-----------|-----------|---|---|---|---|---|-------|-------|-------|-------|
| 6. OCBO   | UL        |   |   |   |   |   | -.39  | .14   | .44   | .43   |
|           | k         |   |   |   |   |   |       | 22    | 20    | 19    |
|           | N         |   |   |   |   |   |       | 4800  | 4269  | 3962  |
|           | $\bar{r}$ |   |   |   |   |   | (.86) | .64   | -.33  | -.17  |
|           | LL        |   |   |   |   |   |       | .34   | -.74  | -.60  |
| 7. OCBI   | UL        |   |   |   |   |   |       | .94   | .09   | .26   |
|           | k         |   |   |   |   |   |       |       | 21    | 19    |
|           | N         |   |   |   |   |   |       |       | 4526  | 3962  |
|           | $\bar{r}$ |   |   |   |   |   |       | (.85) | -.16  | -.11  |
|           | LL        |   |   |   |   |   |       |       | -.70  | -.71  |
| 8. CWBO   | UL        |   |   |   |   |   |       |       | .37   | .08   |
|           | k         |   |   |   |   |   |       |       |       | 20    |
|           | N         |   |   |   |   |   |       |       |       | 4136  |
|           | $\bar{r}$ |   |   |   |   |   |       |       | (.84) | .70   |
|           | LL        |   |   |   |   |   |       |       |       | .21   |
| 9. CWBI   | UL        |   |   |   |   |   |       |       |       | 1.00  |
|           | k         |   |   |   |   |   |       |       |       |       |
|           | N         |   |   |   |   |   |       |       |       |       |
|           | $\bar{r}$ |   |   |   |   |   |       |       |       | (.88) |
|           | LL        |   |   |   |   |   |       |       |       |       |
|           | UL        |   |   |   |   |   |       |       |       |       |

*Note:*  $k$  = the number of independent effect sizes included in each analysis;  $N$  = the number of participants in each analysis;

$\bar{r}$  = corrected correlation value; LL = lower level of the 95% confidence interval; UL = upper level of the 95% confidence interval.

Reliability coefficients are presented in the diagonal in parentheses (in italics).

Table S2

## Sources of Correlations among Study Variables, Supplementary Study

| Variables                | 1   | 2                                | 3                                | 4           | 5                      | 6           | 7           | 8           | 9 |
|--------------------------|-----|----------------------------------|----------------------------------|-------------|------------------------|-------------|-------------|-------------|---|
| 1. Abusive supervision   | -   |                                  |                                  |             |                        |             |             |             |   |
| 2. Distributive justice  | MAC | -                                |                                  |             |                        |             |             |             |   |
| 3. Procedural justice    | MAC | Cohen-Charash<br>& Spector, 2001 | -                                |             |                        |             |             |             |   |
| 4. Interactional justice | MAC | Cohen-Charash<br>& Spector, 2001 | Cohen-Charash<br>& Spector, 2001 | -           |                        |             |             |             |   |
| 5. Work stress           | MAC | MAC                              | MAC                              | MAC         | -                      |             |             |             |   |
| 6. OCBO                  | MAC | Chang, 2015                      | Chang, 2015                      | Chang, 2015 | Chang et al., 2007     | -           |             |             |   |
| 7. OCBI                  | MAC | Chang, 2015                      | Chang, 2015                      | Chang, 2015 | Chang et al., 2007     | Dalal, 2005 | -           |             |   |
| 8. CWBO                  | MAC | Chang, 2015                      | Chang, 2015                      | Chang, 2015 | Carpenter & Berry 2017 | Dalal, 2005 | Dalal, 2005 | -           |   |
| 9. CWBI                  | MAC | Chang, 2015                      | Chang, 2015                      | Chang, 2015 | Hershcovis et al. 2007 | Dalal, 2005 | Dalal, 2005 | Dalal, 2005 | - |

*Note:* MAC indicates a meta-analytic correlation derived from this meta-analytic review.

Table S3  
Fit Statistics for Alternative Models, Supplementary Study

| Models |                                                                                                                 | $\chi^2$ | $df$ | CFI | SRMR | RMSEA | $\Delta\chi^2(\Delta df)/p$ |
|--------|-----------------------------------------------------------------------------------------------------------------|----------|------|-----|------|-------|-----------------------------|
| M1     | Proposed structural model                                                                                       | 521.16   | 19   | .93 | .04  | .11   |                             |
| M2     | Remove non-significant path between abusive supervision and OCB                                                 | 523.98   | 20   | .93 | .04  | .10   | 2.82 (1)/.093               |
| M3     | Remove non-significant path between organizational justice and CWB                                              | 521.16   | 20   | .93 | .04  | .10   | 0.00 (1)/1.000              |
| M4     | Constrain the paths of two mediators to OCB as equal                                                            | 622.35   | 20   | .91 | .06  | .11   | 101.19 (1)/.000             |
| M5     | Constrain the paths of two mediators to OCB as equal and paths of abusive supervision to two mediators as equal | 1335.46  | 21   | .81 | .14  | .16   | 814.30 (2)/.000             |
| M6     | Constrain the paths of two mediators to CWB as equal                                                            | 550.08   | 20   | .92 | .05  | .11   | 28.92 (1)/.000              |
| M7     | Constrain the paths of two mediators to CWB as equal and paths of abusive supervision to two mediators as equal | 1267.20  | 21   | .82 | .14  | .16   | 746.04 (2)/.000             |

*Note.* CFI = comparative fit index; SRMR = standardized root mean square residual; RMSEA = root mean square error of approximation.  $\Delta\chi^2(\Delta df)$  was compared with the proposed structural model (M1). M1-M7 = Model 1-Model 7.

Table S4

## Results of Meta-Analytic Structural Equation Modeling, Supplementary Study

| Variables                   | Organizational justice |           |          | Work stress |           |          | OCB      |           |          | CWB      |           |          |
|-----------------------------|------------------------|-----------|----------|-------------|-----------|----------|----------|-----------|----------|----------|-----------|----------|
|                             | <i>B</i>               | <i>SE</i> | <i>p</i> | <i>B</i>    | <i>SE</i> | <i>p</i> | <i>B</i> | <i>SE</i> | <i>p</i> | <i>B</i> | <i>SE</i> | <i>p</i> |
| <i>Mediator</i>             |                        |           |          |             |           |          |          |           |          |          |           |          |
| Organizational justice      |                        |           |          |             |           |          | .33      | .04       | .000     | .00      | .04       | .919     |
| Work stress                 |                        |           |          |             |           |          | -.13     | .02       | .000     | .23      | .02       | .000     |
| <i>Independent variable</i> |                        |           |          |             |           |          |          |           |          |          |           |          |
| Abusive supervision         | -.36                   | .02       | .000     | .37         | .02       | .000     | -.04     | .02       | .091     | .31      | .02       | .000     |
| <i>R</i> <sup>2</sup>       | .30                    |           |          | .14         |           |          | .09      |           |          | .23      |           |          |

*Note.* *B* represents unstandardized coefficients; *SE* represents standard errors of the regression coefficients.
